# Supplementary material for: Changes in prescribed medicines in older patients with multimorbidity and polypharmacy in general practice
Source: Springer Nature journal article supplement (doi:10.1186/s12875-018-0825-3), 2018-07-28

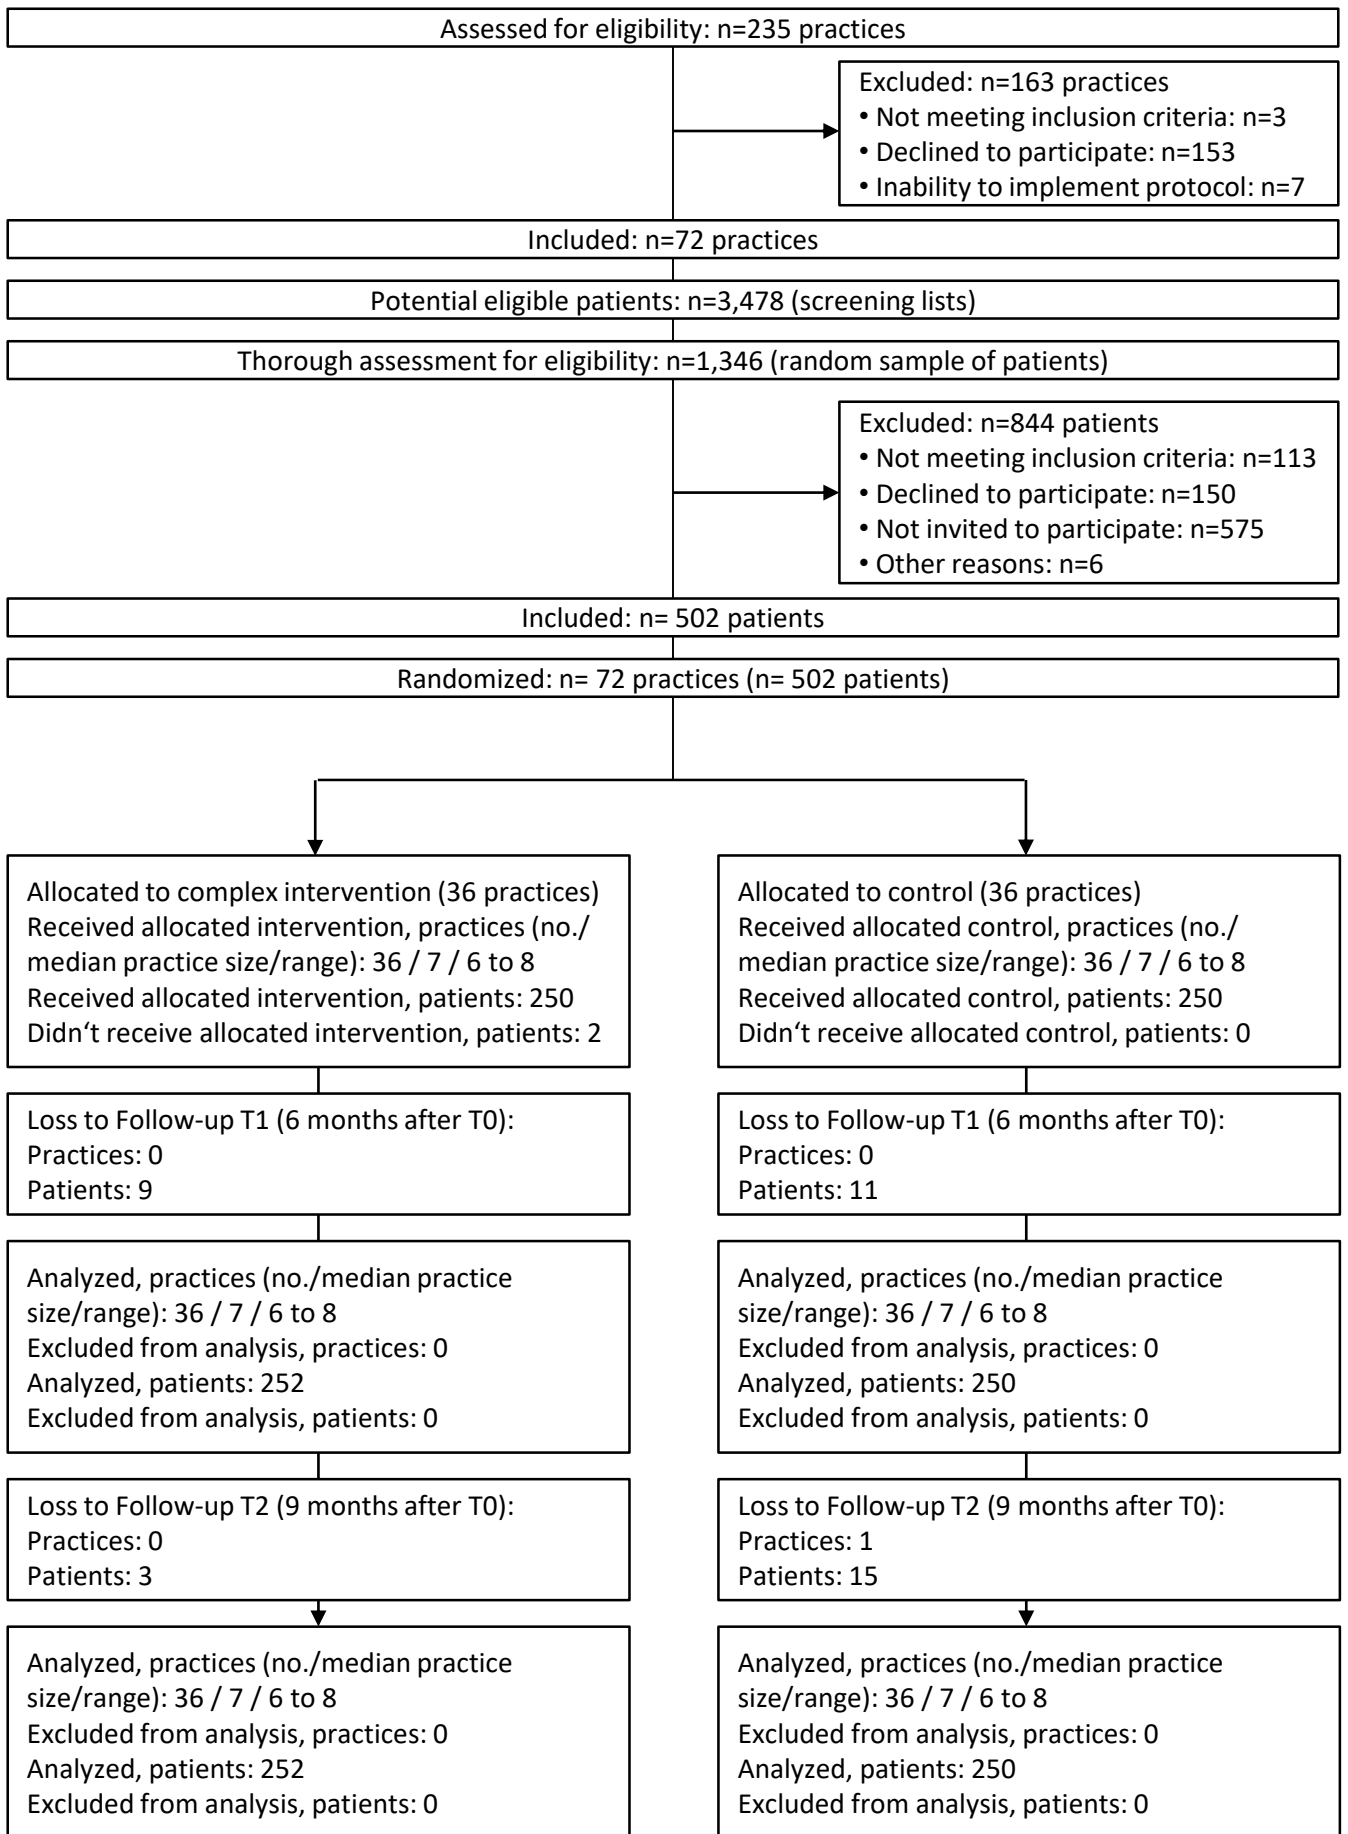

Supplement: MOESM1 [file 12875_2018_825_MOESM1_ESM.pdf]
